# Supplementary material for: Integrin α2β1 in nonactivated conformation can induce focal adhesion kinase signaling
Source: PubMed Central journal article supplement (PMC5469853; doi:10.1038/s41598-017-03640-w), 2017-06-13
Supplement: 41598_2017_3640_MOESM1_ESM.pdf [file 41598_2017_3640_MOESM1_ESM.pdf]

1 **SUPPLEMENTARY DATA**

2

3 **Integrin  $\alpha 2\beta 1$  in nonactivated conformation can induce focal adhesion kinase signaling**

4

5 Maria Salmela<sup>1</sup>, Johanna Jokinen<sup>1,2</sup>, Silja Tiitta<sup>1</sup>, Pekka Rappu<sup>1</sup>, Holland Cheng<sup>2</sup> & Jyrki Heino<sup>1,\*</sup>

6

7 <sup>1</sup>Department of Biochemistry, University of Turku, Turku, Finland

8 <sup>2</sup>Department of Molecular and Cellular Biology, University of California, Davis, CA, USA

9

10 \*Corresponding author. Tel: +358 2 3336879; E-mail jyrki.heino@utu.fi

11

12

13 **SUPPLEMENTARY METHODS**

14

15 **Covalent and noncovalent linking of EV1**

16 Covalent linking of EV1 to cover glasses was performed at the University of Tampere in collaboration  
17 with Vesa Hytönen, according to their modified protocol for thin gels originally described in Buxboim  
18 *et al.*, 2010. Cover glasses were soaked in 0.1 M NaOH and aminosilanized with (3-aminopropyl)-  
19 triethoxysilane under vacuum. Next, the glasses were treated with Sulfo-SANPAH (1 mg/ml in HEPES)  
20 and glass surface was photoactivated with UV-light. After washing with HEPES (50mM, pH 8.5), EV1  
21 in PBS (2.5  $\mu\text{g}/\text{cm}^2$ ) was added on top of the cover glass and incubated at +4 overnight. For  
22 noncovalent linking, glasses were treated with 0.1 M NaOH.

23

24 **Flow cytometry**

25 SaOS cells were trypsinised, washed and suspended in blocking buffer (1 % FCS in PBS). Cells were  
26 incubated for 1 h with  $\alpha 2$  integrin primary antibody (12F1, BD Biosciences) and for 1 h with FITC-  
27 conjugated anti-mouse secondary antibody (A16167, Novex, Life Technologies). As controls, FITC-  
28 labelled cells were used. Cells were washed and suspended in PBS, and  $\alpha 2$  integrin levels were  
29 measured with FACS Calibur (BD Biosciences). Graphs were drawn with Flowing Software 2 (Turku  
30 Centre for Biotechnology, Turku, Finland).

31 **Immunoprecipitation of  $\alpha$ 2- $\beta$ 1 heterodimer**

32 SaOS <sup>$\alpha$ 2-</sup>, SaOS <sup>$\alpha$ 2+</sup> and SaOS <sup>$\alpha$ 2E336A</sup> cell monolayers were washed with ice cold buffer containing 150  
33 mM NaCl, 1mM CaCl<sub>2</sub>, 1mM MgCl<sub>2</sub>, and Tris-HCl (pH 7.4). Cells from three 10 cm plates were  
34 collected with 1 ml of a buffer by scraping, and then pooled. Cells were pelleted by centrifugation (500  
35 G, 4 min) and the pellets were solubilized with 0.5 ml of the same buffer containing 100 mM n-octyl-6-  
36 D-glycopyranoside (Sigma) on ice for 15 min with occasional vortexing. The lysates were cleared first  
37 by centrifugation (13000 G, 4 min, +4) and then by 1 hour incubation with G-Sepharose 4 Fast Flow  
38 beads (GE Healthcare) in the presence of bovine serum albumin (0.5 mg/ml) and Triton x-100 (0.5  
39 v/v%). The resulting supernatants were immunoprecipitated with  $\alpha$ 2 integrin 12F1 antibody (mouse  
40 anti-human, BD Biosciences) for 12 hours and the complexes were recovered by binding to G-  
41 Sepharose beads for 1 hour. The beads were washed three times with a buffer containing 150 mM  
42 NaCl, 25 mM Tris-HCl (pH 7.4), 0.1 v/v% Triton x-100 and 1 mg/ml bovine serum albumin, and twice  
43 with a buffer containing 150 mM NaCl and 25 mM Tris-HCl (pH 7.4). The immunoprecipitates were  
44 detached from the beads with a non-reducing Laemmli-buffer (with SDS) by boiling for 5 min and  
45 analysed by electrophoresis on SDS-PAGE gels. Proteins were electrotransferred to nitrocellulose  
46 membrane and the membrane was blocked with blocking buffer (5 % milk powder, 1 % BSA, TBST)  
47 for 1 hour.  $\beta$ 1 integrin was detected with rabbit  $\beta$ 1 antibody R332 (Heino *et al.*, 1989) in blocking  
48 buffer for 1 hour in RT and using a donkey anti-rabbit secondary antibody (Li-COR IRDye 800CW,  
49 Li-COR Biosciences). Antibody was removed with stripping buffer (Glycine-HCl, 2 times 10 min).  $\alpha$ 2  
50 integrin was detected with rat anti-human antibody (R&D Systems, clone 430903) in a blocking buffer  
51 for 1 hour in RT and using goat anti-rat secondary antibody (Li-COR IRDye 680RD, Li-COR  
52 Biosciences). Odyssey CLx from Li-COR Biosciences was used for the detection of fluorescent  
53 secondary antibodies.

54

55 **Inhibitor-effect on EV1 infection**

56 Cells were treated with Safingol (10  $\mu$ M, 30 minutes, Calbiochem) and NSC 23766 (100  $\mu$ M; 1 hour;  
57 Santa Cruz Biochemistry, Inc) prior to and during EV1 infection. Inhibitors were added to the cells in  
58 DMEM without serum and incubated at +37 °C. For EV1 infection assay adherent SaOS <sup>$\alpha$ 2+</sup> cells were  
59 incubated with EV1 in serum free DMEM on ice for 1 hour. Unbound virus was removed by washing  
60 the cells with PBS, and DMEM including 10 % FCS was added. Virus infection was allowed to  
61 proceed for 5 to 6 hours at +37 C. Cells were fixed in 4 % paraformaldehyde (Thermo Scientific) for

62 20 minutes at room temperature, permeabilised with 0,2 % Triton x-100 in PBS for 5 minutes, and  
63 labelled with anti-EV1 antibody <sup>17</sup> and DRAQ5 (Cell Signaling) or DABI nuclear label. Cells were  
64 imaged with Leica TCS SP5 Matrix or Zeiss Axiovert 200M. Number of infected cells was analysed  
65 with BioImage XD <sup>29</sup>.

66

### 67 **Analysis of EV1 infected cells**

68 For the analysis of EV1 infection after PKC $\alpha$  and Rac1 inhibition, three replicate wells and 9 images  
69 per well were analysed in each experiment. Image analysis was performed with BioImage XD Batch  
70 processor –function <sup>29</sup>. Percent of infected cells was calculated as a ratio of EV1 positive areas versus  
71 DAPI/DRAQ5 labelled nuclei. Noise from both channels was reduced using Gaussian smoothing –  
72 filter. Thresholds for EV1 and DAPI/DRAQ5 channels were determined manually. EV1 channel was  
73 segmented using Connected component labelling, and DAPI/DRAQ5 channel using Object separation.  
74 Infection percent was calculated using the value Number of segmented objects from each image.

75

76

### 77 **SUPPLEMENTARY REFERENCES**

78

79 Buxboim A, Rajaqopal K, Brown AEX, Discher DE (2010) How deeply cells feel: methods for thin  
80 gels. *J Phys Condens Matter* **22**: 1–19.

81

82 Heino J, Igotz RA, Hemler ME, Crouse C, Massagué J (1989) Regulation of cell adhesion receptors  
83 by transforming growth factor-beta. Concomitant regulation of integrins that share a common beta 1  
84 subunit. *J Biol Chem* **264**: 380–388.

85

86

87

88

89

90

91 **SUPPLEMENTARY FIGURES**

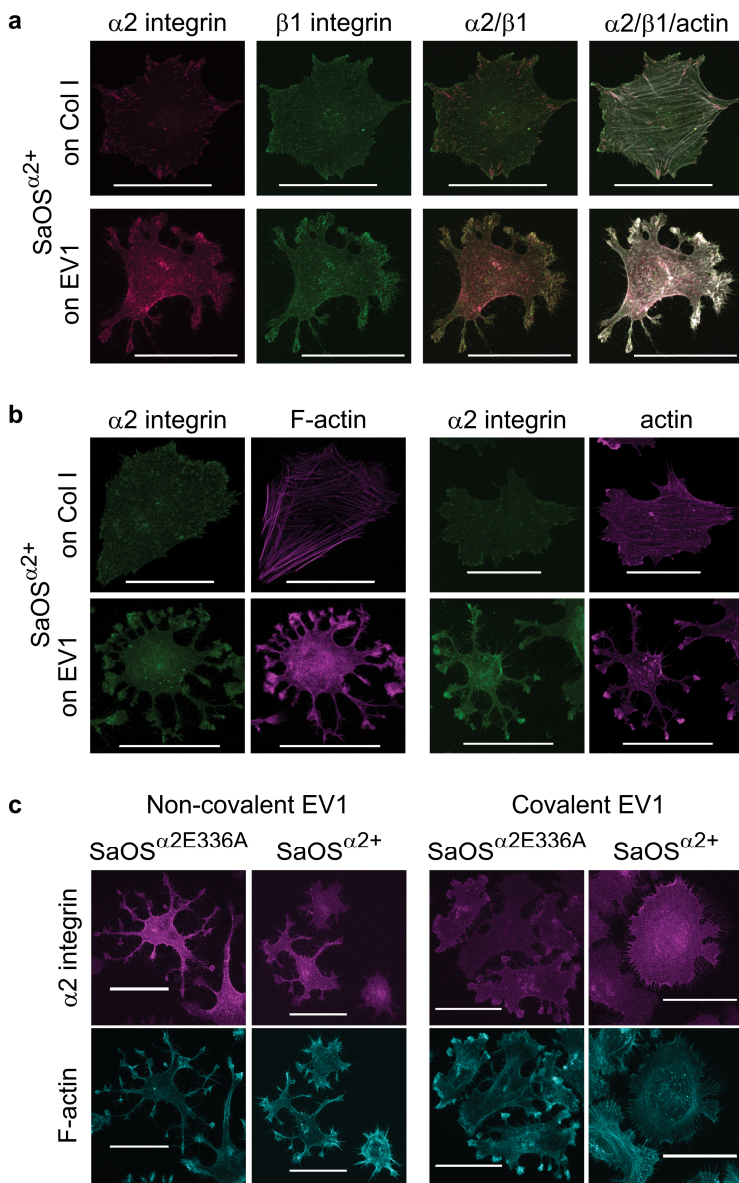

92

93 **Figure S1 - SaOS cells do not form focal adhesions or stress fibers on EV1 coated surface.**

94 (a) Confocal microscopy images of SaOS $\alpha 2^+$  cells plated on Collagen I and EV1 coated surface (60

95 min)  $\alpha 2$  integrins,  $\beta 1$  integrins and actin stress fibers were labelled using specific antibodies and

96 phalloidin, respectively. Scale bar 50  $\mu\text{m}$  (b) Confocal microscopy images of SaOS $\alpha 2^+$  cells plated on

97 Collagen I and EV1 coated surface (60 min).  $\alpha 2$  integrins, globular actin and actin stress fibers were

98 labelled using specific antibodies and phalloidin, respectively. Scale bar 50  $\mu\text{m}$ . (c) Confocal

99 microscopy images of SaOS $\alpha 2^+$  and SaOS $\alpha 2^{\text{E336A}}$  cells plated on EV1 coated surface after either non-

100 covalently or covalently linking EV1 to glass.  $\alpha 2$  integrins were labelled using specific antibody and  
101 actin stress fibers using Alexa-633 conjugated phalloidin. Scale bar 50  $\mu\text{m}$ .

102

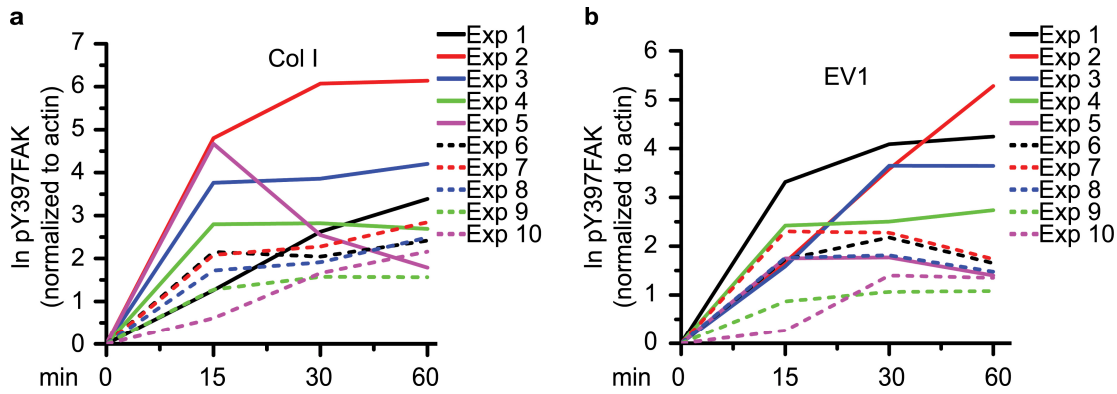

103

104 **Figure S2 - FAK is phosphorylated both on Col and EV1 coated surfaces.**

105 Figure shows ten independent Western blotting experiments of FAK Y397 phosphorylation in SaOS $\alpha 2^+$   
106 cells spreading on an immobilized layer of EV1. Phospho-FAK levels were normalized first against  
107 actin and then against the smallest value in the experiment for the comparison between experiments.

108

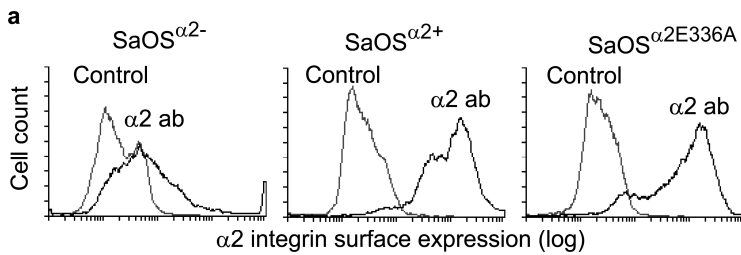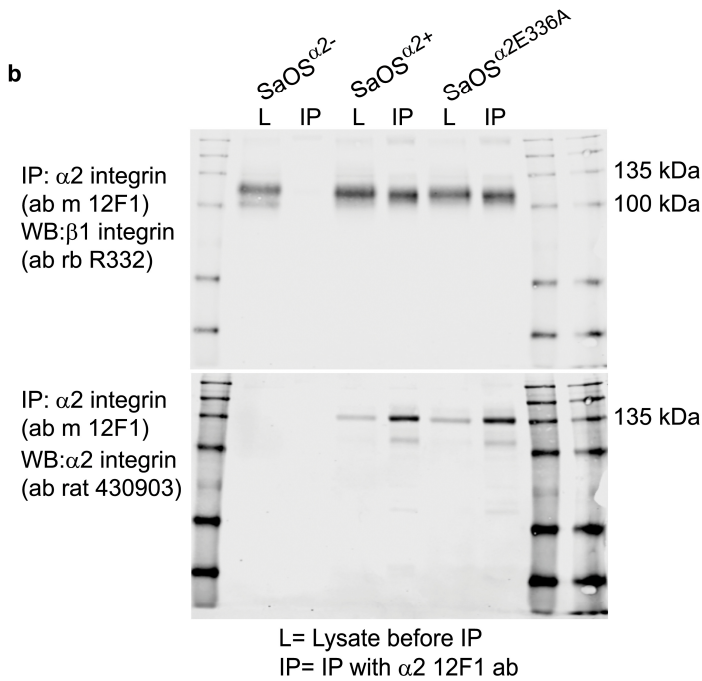

109

110 **Figure S3 – Cell surface expression levels of transfected  $\alpha 2$ -integrins and  $\alpha 2$ - $\beta 1$  dimerization.**

111 (a) Flow cytometric analysis of the surface expression of transfected  $\alpha 2$ -integrin in SaOS <sup>$\alpha 2^+$</sup>  and  
 112 SaOS <sup>$\alpha 2^{E336A}$</sup>  cells, as well as lack of  $\alpha 2$  in SaOS <sup>$\alpha 2^-$</sup>  cells. Cell surface integrins were labelled with  $\alpha 2$   
 113 specific antibody and FITC-conjugated secondary antibody, and cells were analysed with FACS  
 114 Calibur. (b) Immunoprecipitation of  $\alpha 2$  integrin from SaOS <sup>$\alpha 2^-$</sup> , SaOS <sup>$\alpha 2^+$</sup>  and SaOS <sup>$\alpha 2^{E336A}$</sup>  cells and co-  
 115 immunoprecipitation of  $\beta 1$  subunit.  $\alpha 2$  was immunoprecipitated with 12F1 antibody, following western  
 116 blotting of  $\beta 1$  subunit (rabbit R332) and  $\alpha 2$  subunit using a different  $\alpha 2$  recognizing antibody (R&D  
 117 clone 430903).

118

119

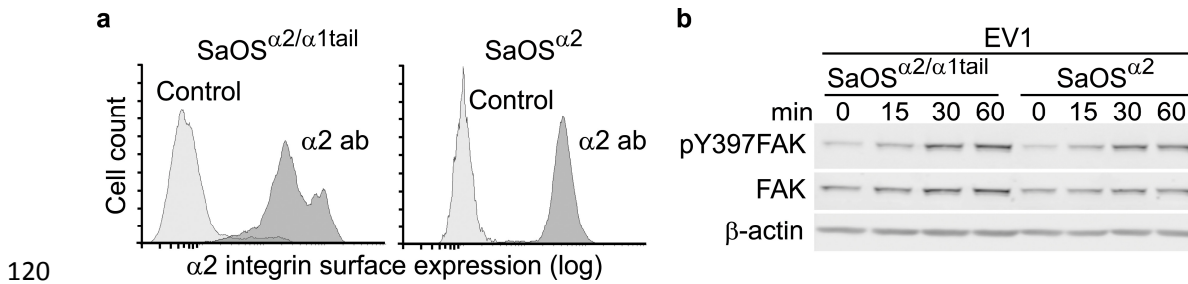

120

121 **Figure S4 - FAK phosphorylation is not α-tail selective.**

122 (a) Flow cytometric analysis of the surface expression of transfected α2-integrin in SaOS<sup>α2/α1tail</sup> and  
 123 SaOS<sup>α2+</sup> cells. Cell surface integrins were labeled with α2-specific antibody and FITC-labeled  
 124 secondary antibody and analysed with FACS Calibur flow cytometer. (b) Western blotting analysis of  
 125 FAK phosphorylation at Y397 in SaOS<sup>α2+</sup> and SaOS<sup>α2/α1tail</sup> cells plated on EV1.

126

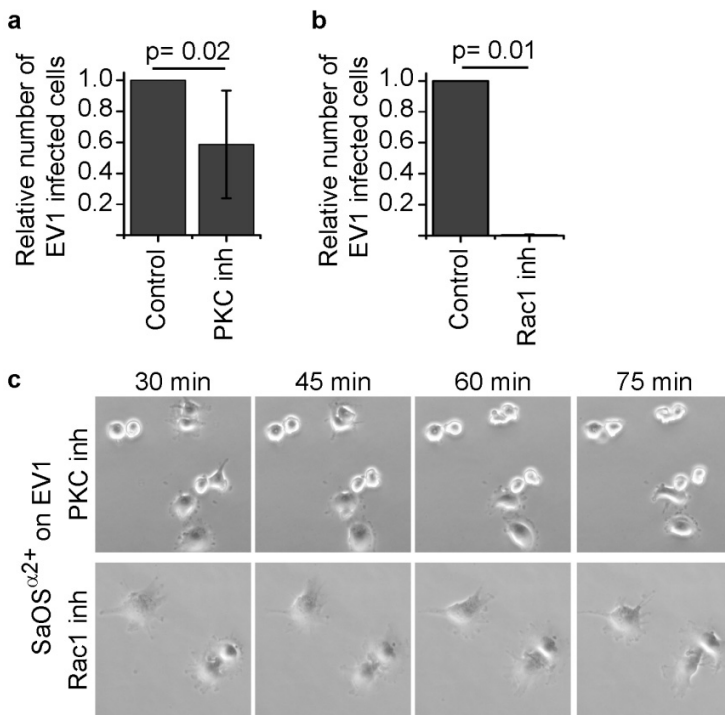

127

128 **Figure S5 - Inhibition of PKC and Rac1 prevent EV1 entry but not cell adhesion to immobilized**  
 129 **layer of EV1.**

130 (a) Calculation of the relative number of EV1 coat antibody positive SaOS<sup>α2+</sup> cells after incubating  
 131 cells with EV1 particles for 6 h. In parallel experiments SaOS<sup>α2+</sup> cells were treated with PKC inhibitor  
 132 safinol (10 μM, 30 min), or with Rac inhibitor NSC23766 (100 μM, 1 h) prior to and during  
 133 incubation with EV1. Results from five (PKC) or four (Rac1) independent experiments were analysed

134 with two-tailed paired Student's t-test and data are presented as mean value +/- SD. **(b)** Phase contrast  
135 microscope images of SaOS<sup>α2+</sup> cells plated on an immobilized layer of EV1 after treating the cells with  
136 either PKC inhibitor (safingol, 10 μM, 30min), or Rac1 inhibitor (NSC23766, 100 μM, 1 h), prior to  
137 and during cell plating. Cells were photographed after 30, 45, 60, and 75 min.
